# Supplementary material
Source: publisher figshare collection journal article supplement (https://gsajournals.figshare.com/articles/dataset/_/10257524)
Supplement: Supplementary file 1 [file 1]

**A.**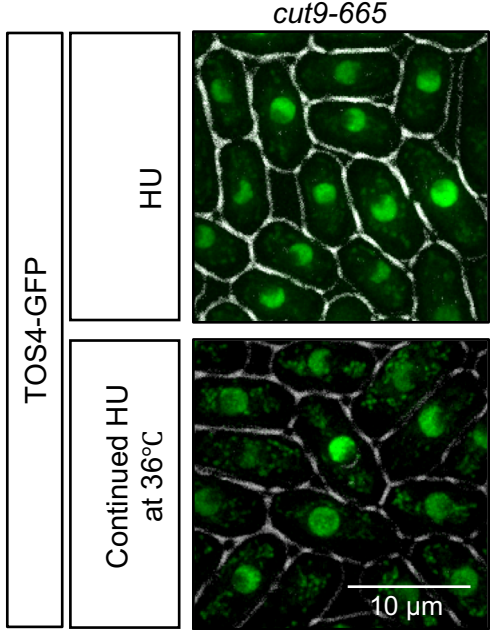**B.**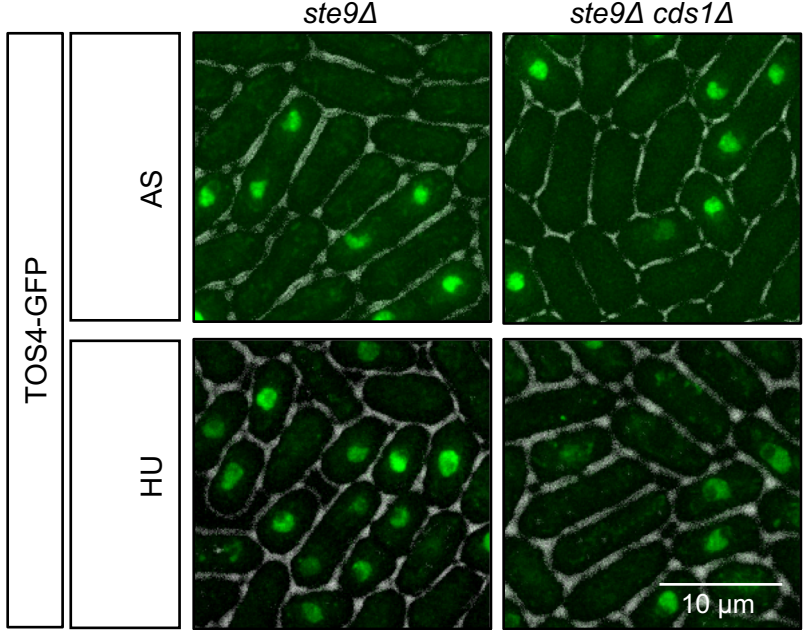**C.**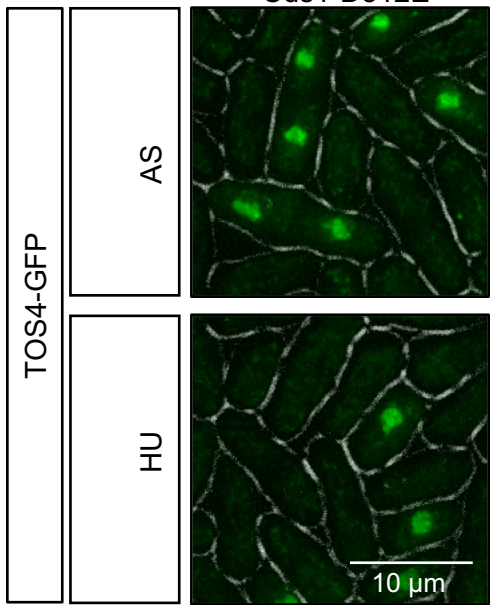

**Figure S1.** (A) Temperature-sensitive APC mutant *cut9-665* was imaged for Tos4-GFP after treatment with 12 mM HU at 25°C, or after pre-treatment with HU at 25°C then transfer to 36°C. (B) Ste9-deficient cells with or without Cds1 were imaged for Tos4-GFP in asynchronous (AS) culture, or after treatment with 12 mM HU. (C) *cds1Δ* cells with Kinase-dead Cds1 (D312E) were imaged for Tos4-GFP in asynchronous (AS) culture, or after treatment with 12 mM HU.

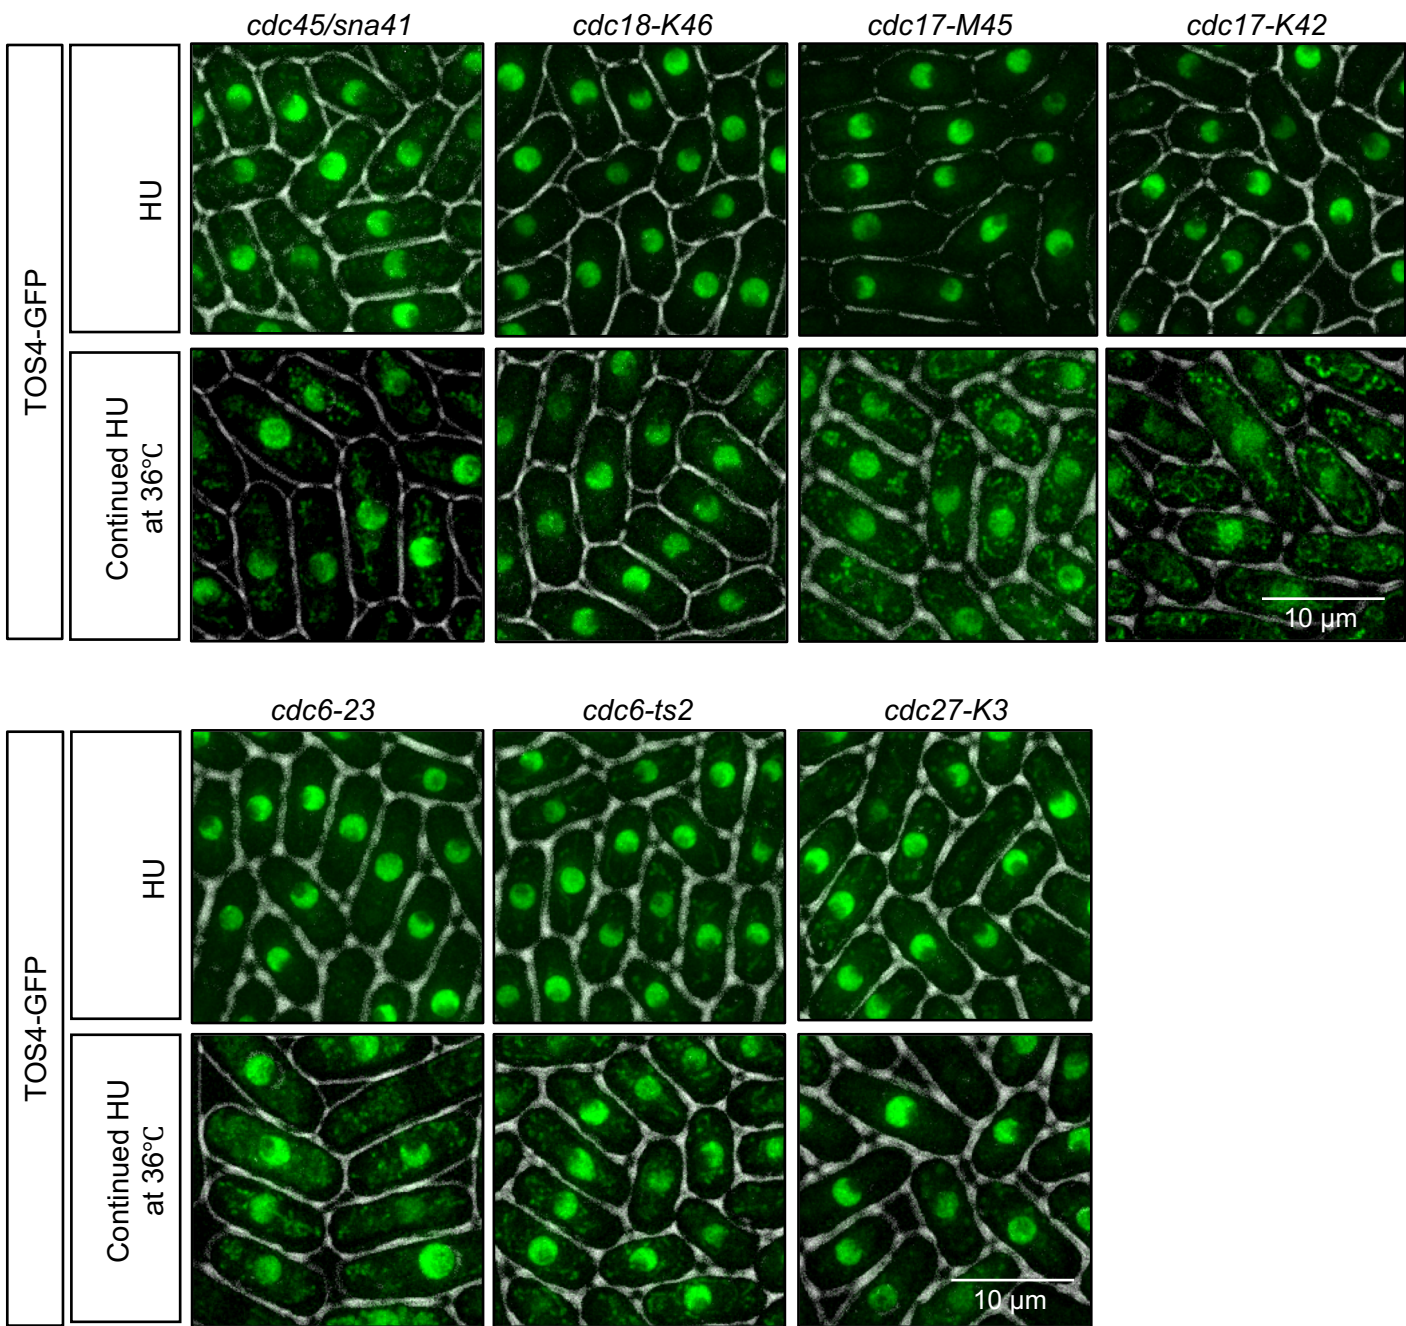

**Figure S2.** Temperature-sensitive replication mutants *cdc45/sna41*, MCM loader mutant (*cdc18-K46*), ligase mutants (*cdc17-M45* and *cdc17-K42*), and polymerase delta mutants (*cdc6-23*, *cdc6-ts2*, and *cdc27-K3*) were imaged for Tos4-GFP after treatment with 12 mM HU at 25°C, or after pre-treatment with HU at 25°C then transfer to 36°C.
